# Supplementary material for: Coherence control via dynamical decoupling of an electron spin in a quantum dot
Source: Oxford University Press journal article supplement (doi:10.2337/dc10-1791), 2007-03-09
Supplement: dc101791supplementarydata.pdf [file dc101791supplementarydata.pdf]

SUPPLEMENTARY DATA

Supplementary Table 1. Characteristics of all the EDC participants at the 18-year Clinical Exam Compared to the Subsample Participating in the Skin Intrinsic Fluorescence (SIF) Substudy, %, mean, or median (IQR).

| Characteristics                             | Total population participating in 18-year follow-up | SIF substudy population at 18-year follow-up | 18-year follow-up participants not in SIF substudy | p-value* |
|---------------------------------------------|-----------------------------------------------------|----------------------------------------------|----------------------------------------------------|----------|
| Age (years)                                 | 45.0 (7.5)                                          | 46.5 (7.0)                                   | 44.2 (7.6)                                         | 0.01     |
| Duration (years)                            | 36.8 (7.1)                                          | 37.5 (6.9)                                   | 36.5 (7.2)                                         | 0.24     |
| Sex (female)                                | 51.5                                                | 54.9                                         | 50.0                                               | 0.40     |
| Race (White)                                | 98.4                                                | 97.1                                         | 99.0                                               | 0.20     |
| HbA1c (%)                                   | 7.9 (1.7)                                           | 7.6 (1.5)                                    | 8.0 (1.8)                                          | 0.03     |
| Updated mean HbA1c (%)                      | 8.7 (1.1)                                           | 8.4 (1.0)                                    | 8.6 (1.1)                                          | 0.04     |
| BMI (kg/m <sup>2</sup> )                    | 27.1 (4.5)                                          | 26.1 (4.4)                                   | 27.6 (4.5)                                         | 0.006    |
| Serum creatinine (mg/dL)**                  | 1.0 (0.90-1.2)                                      | 1.0 (0.90-1.1)                               | 1.0 (0.90-1.2)                                     | 0.75     |
| HDLc (mg/dL)                                | 58.7 (16.3)                                         | 59.9 (17.8)                                  | 58.0 (15.5)                                        | 0.35     |
| Non-HDLc (mg/dL)                            | 117.0 (36.4)                                        | 109.9 (28.4)                                 | 120.5 (39.5)                                       | 0.008    |
| SBP (mm Hg)                                 | 116.8 (16.5)                                        | 114.2 (14.4)                                 | 118.1 (17.4)                                       | 0.04     |
| DBP (mm Hg)                                 | 66.3 (10.8)                                         | 64.3 (10.4)                                  | 67.3 (10.9)                                        | 0.02     |
| Hypertension medication use                 | 25.4                                                | 18.6                                         | 28.8                                               | 0.05     |
| ACE medication use                          | 54.1                                                | 55.9                                         | 53.2                                               | 0.65     |
| Autonomic neuropathy                        | 57.7                                                | 59.8                                         | 56.6                                               | 0.59     |
| Confirmed distal symmetrical polyneuropathy | 57.7                                                | 64.7                                         | 54.2                                               | 0.08     |

\*Difference between SIF participants and SIF non-participants at 18-year clinical exam

\*\*Natural logarithmically transformed before analyses

HDLc=high density lipoprotein cholesterol

SBP=systolic blood pressure

DBP=diastolic blood pressure

ACE=angiotensin converting enzyme

SUPPLEMENTARY DATA

**Supplementary Table 2. Relationship of Skin Intrinsic Fluorescence with the Clinical Characteristics of the EDC Population**

| Characteristic                               | r     | OR (95% CI)      | p-value |
|----------------------------------------------|-------|------------------|---------|
| Autonomic neuropathy                         |       | 3.43 (1.97-5.97) | <0.0001 |
| Confirmed distal symmetrical                 |       | 3.10 (1.82-5.26) | <0.0001 |
| Age (years)                                  | 0.42  |                  | <0.0001 |
| Duration (years)                             | 0.37  |                  | <0.0001 |
| Sex (female)                                 |       | 1.17 (0.81-1.69) | 0.41    |
| Height (m)                                   | -0.16 |                  | 0.11    |
| Pulse (beats/min)                            | 0.06  |                  | 0.55    |
| R-R interval*                                | -0.47 |                  | <0.0001 |
| Toe vibratory threshold*                     | 0.50  |                  | <0.0001 |
| BMI (kg/m <sup>2</sup> )                     | -0.07 |                  | 0.50    |
| HbA1c (%)                                    | 0.13  |                  | 0.19    |
| Updated mean HbA1c (%)                       | 0.26  |                  | 0.006   |
| Albumin excretion rate (µg/min)*             | 0.36  |                  | 0.0003  |
| Serum creatinine (mg/dL)*                    | 0.32  |                  | 0.0006  |
| Systolic blood pressure (mm Hg)              | 0.31  |                  | 0.001   |
| Diastolic blood pressure (mm Hg)             | -0.09 |                  | 0.37    |
| Blood pressure medication use                |       | 1.75 (1.06-2.89) | 0.03    |
| High density lipoprotein cholesterol (mg/dL) | 0.08  |                  | 0.40    |
| Non-high density lipoprotein cholesterol     | -0.08 |                  | 0.42    |
| ACE medication use                           |       | 1.53 (1.03-2.29) | 0.04    |
| History of smoking                           | 1.58  | (1.02-2.46)      | 0.04    |

\*Natural logarithmically transformed before analysis.

**Supplementary Table 3. Mean Skin Intrinsic Fluorescence Level (AU)\* by Autonomic Neuropathy and Confirmed Distal Symmetrical Polyneuropathy Status and Time Interval since Last Clinical Exam in the EDC Study**

|                                                    | Case  | Non-case | p-value |
|----------------------------------------------------|-------|----------|---------|
| <b>Autonomic Neuropathy</b>                        |       |          |         |
| ≤Median follow-up time from last visit             | 0.01  | 0.008    | 0.002   |
| > Median follow-up time from last visit            | 0.009 | 0.007    | 0.0002  |
|                                                    |       |          |         |
| <b>Confirmed Distal Symmetrical Polyneuropathy</b> |       |          |         |
| ≤Median follow-up time from last visit             | 0.01  | 0.007    | 0.002   |
| > Median follow-up time from last visit            | 0.009 | 0.008    | 0.0002  |

AU=arbitrary units \*Natural Logarithmically transformed before analysis

SUPPLEMENTARY DATA

**Supplementary Table 4. Characteristics of MedStar Study Participants by Distal Symmetrical Polyneuropathy Status**

| Characteristics                            | MedStar (Type 1 Diabetes Participants) |                 |         |
|--------------------------------------------|----------------------------------------|-----------------|---------|
|                                            | cases (n=16)                           | noncases (n=42) | p-value |
| Skin intrinsic fluorescence (AU)*          | 0.0077 (0.0016)                        | 0.0066 (0.0019) | 0.07    |
| Age (yrs)                                  | 53.6 (12.9)                            | 47.9 (9.3)      | 0.07    |
| Diabetes duration (yrs)                    | 34.3 (9.7)                             | 26.2 (12.2)     | 0.02    |
| Sex (female)                               | 43.8 (7)                               | 50.0 (21)       | 0.67    |
| HbA1c (%)                                  | 8.0 (1.1)                              | 7.8 (1.0)       | 0.62    |
| Updated mean HbA1c (%)                     | 8.1 (0.78)                             | 7.8 (0.99)      | 0.30    |
| Body mass index (BMI (kg/m <sup>2</sup> )) | 26.6 (3.1)                             | 26.4 (4.3)      | 0.84    |
| Height (cm)                                | 166.3 (14.0)                           | 172.7 (8.6)     | 0.12    |
| Heart rate (beats/min)                     | 78.6 (7.9)                             | 76.4 (9.3)      | 0.45    |
| Serum creatinine (mg/dl) *                 | 1.2 (0.71)                             | 0.93 (0.20)     | 0.25    |
| HDL cholesterol (mg/dl)                    | 64.4 (20.4)                            | 64.7 (19.6)     | 0.96    |
| Non-HDL cholesterol (mg/dl)*               | 111.2 (34.1)                           | 107.7 (33.3)    | 0.66    |
| Systolic blood pressure (mm Hg)            | 127.1 (19.2)                           | 121.6 (12.8)    | 0.30    |
| Diastolic blood pressure (m Hg)            | 71.6 (8.7)                             | 72.4 (9.3)      | 0.78    |
| Coronary artery disease                    | 6.3 (1)                                | 7.1 (3)         | 1.00**  |
| Overt nephropathy                          | 26.7 (4)                               | 2.4 (1)         | 0.02    |
| Proliferative retinopathy                  | 43.8 (7)                               | 11.9 (5)        | 0.01    |
| Autonomic neuropathy                       | 37.5 (6)                               | 11.9 (5)        | 0.06    |
| Lower extremity arterial disease           | 6.3 (1)                                | 0.0 (0)         | <0.0001 |
| Hypertension medication use                | 68.8 (11)                              | 52.4 (22)       | 0.26    |
| A history of smoking                       | 25.0 (3)                               | 21.2 (7)        | 0.29    |

\*Natural logarithmically transformed before analyses. \*\*Fisher's exact test
